# Supplementary material for: The Emergence of Rice and Millet Farming in the Zang-Yi Corridor of Southwest China Dates Back to 5000 Years Ago
Source: Frontiers journal article supplement (doi:10.3389/feart.2022.874649), 2022-04-28
Supplement: Table_1.XLSX [file Table_1.XLSX]

## Sheet: author information
The emergence of rice and millet farming in the Zang-Yi Corridor of southwest China dates back to 5300 years ago
Xiujia Huan1, Zhenhua Deng2,3*, Zhiqing Zhou4, Xue Yan4, Xiaoxiao Hao5, Qi Bu6, Houyuan Lu1,7
1 Institute of Geology and Geophysics, Chinese Academy of Sciences, Key Laboratory of Cenozoic Geology and Environment, Beijing, 100029
2 Center for the Study of Chinese Archaeology, Peking University, Beijing, 100871
3 School of Archaeology and Museology, Peking University, Beijing, 100871
4 Chengdu Municipal Institute of Cultural Relics and Archaeology, Chengdu, 610072
5 Wuhan University, School of History, Wuhan, 430072
6 Museum of Liangshan Yi Autonomous Prefecture, Xichang, 615000
7 University of Chinese Academy of Sciences, Beijing, 100049

## Sheet: Sheet1
Code	Context	Period	Bilobate	Multilobate	Short saddle	Long saddle	Rondel	Trapeziform sinuate	Hair cell	Bulliform	Reed bulliform	Elongate psilate	Elongate echinate	Square	Rectangle	Rice bulliform	Rice double-peaked	Rice parallel bilobate	Foxtail millet Ω type	Broomcorn millet η type	Unknown millet husk	Pooideae husk	Stoma	Woody type	Proportion of rice bulliform with≥9 scales
1	F21NE	I	4.5045	0.3003	0	2.4024	8.10811	0.600601	12.3123	3.9039	0	42.6426	8.10811	8.40841	7.20721	1.5015	0	0	0	0	0	0	0	0	0.470588
2	F21E	I	4.44444	0.31746	0	1.26984	3.1746	0	12.381	6.98413	0.634921	33.3333	6.66667	16.8254	12.381	0.952381	0	0	0	0.634921	0	0	0	0	0.48
3	F21SE	I	5.80862	0	0	1.8343	5.80862	0.305717	22.3173	6.42006	0	19.2602	3.97432	19.2602	13.7573	1.22287	0	0	0	0.0305717	0	0	0	0	0.5
4	F21stone	I	11.6477	0	0	1.13636	3.97727	0.284091	18.75	9.65909	0	23.8636	3.69318	16.4773	9.94318	0.568182	0	0	0	0	0	0	0	0
5	F21pottery	I	7.4184	0	0	3.26409	10.9792	0.296736	16.0237	5.04451	0.890208	19.5846	3.56083	18.3976	13.9466	0.593472	0	0	0	0	0	0	0	0	0.54902
6	F21W	I	2.08955	0	0	9.55224	16.7164	1.49254	12.5373	8.65672	0	25.0746	5.07463	11.0448	7.16418	0.597015	0	0	0	0	0	0	0	0	0.509804
7	H140	I	3.8961	0	0	5.19481	15.8442	1.2987	11.1688	4.93506	0.25974	21.5584	2.07792	22.5974	9.35065	1.81818	0	0	0	0	0	0	0	0	0.54902
8	H145	I	11.4804	0	0	3.62538	16.6163	0.906344	14.5015	6.94864	0	19.3353	5.43807	15.71	4.83384	0.60423	0	0	0	0	0	0	0	0	0.44
9	TN25E38⑦	I	4.33333	0	0	7	8.66667	0.666667	10.6667	7.33333	0.333333	26	3	23.3333	7.66667	1	0	0	0	0	0	0	0	0	0.46
10	TN31E34⑥	I	0.320513	0	0	4.48718	15.0641	0.961538	8.65385	3.52564	0	22.4359	6.41026	24.6795	9.61538	3.84615	0	0	0	0	0	0	0	0	0.568966
11	TN32E35⑥	I	2.48447	0	0	1.86335	10.559	0	17.7019	8.38509	0	16.7702	4.34783	23.6025	12.1118	1.86335	0	0	0	0.310559	0	0	0	0	0.44
12	TN32E37⑥	I	6.34921	0	0	3.80952	10.7937	0.634921	14.2857	6.03175	0	20.9524	2.22222	23.4921	9.52381	1.90476	0	0	0	0	0	0	0	0	0.44
13	TN32E37⑦	I	7.26744	0	0	3.48837	12.2093	0	15.6977	1.16279	0	18.0233	4.65116	23.8372	11.3372	2.32558	0	0	0	0	0	0	0	0	0.46
14	TN32E38⑥	I	4.27632	0	0	4.27632	10.5263	0	16.7763	11.8421	0.657895	23.6842	1.97368	17.4342	7.89474	0.657895	0	0	0	0	0	0	0	0
15	TN33E34⑥	I	7.61905	0	0	6.66667	21.9048	0	10.7937	4.7619	0	18.0952	3.1746	15.873	9.20635	1.90476	0	0	0	0	0	0	0	0	0.528302
16	TN33E36⑥	I	3.94737	0	0.328947	3.61842	11.8421	0	12.8289	7.23684	0.657895	26.3158	4.27632	16.4474	10.8553	1.64474	0	0	0	0	0	0	0	0	0.52
17	F8	II	9.74026	0	0.324675	5.51948	7.79221	0.324675	8.11688	4.22078	0.324675	37.6623	8.11688	6.49351	10.0649	0.974026	0	0	0	0.324675	0	0	0	0	0.519231
18	F9①	II	6.11621	0	0	3.36391	6.11621	0.611621	15.9021	3.36391	0.30581	39.7554	5.50459	11.0092	7.03364	0.611621	0	0	0	0.30581	0	0	0	0	0.54902
19	F9②	II	8.75706	0.282486	0	2.54237	9.32203	0	9.03955	3.67232	0	34.4633	4.51977	9.60452	9.88701	1.12994	0.564972	0	2.54237	3.67232	0	0	0	0	0.538462
20	F9③	II	3.39506	0	0	1.85185	9.25926	0.925926	9.25926	5.8642	0.308642	34.2593	4.32099	14.8148	13.5802	1.54321	0.617284	0	0	0	0	0	0	0	0.54
21	F9④	II	11.2137	0	0	3.95778	19.4591	0.989446	3.95778	0.329815	0	39.5778	8.5752	5.27704	6.26649	0.362797	0	0	0	0.0329815	0	0	0	0	0.571429
22	F9⑤	II	6.68693	0	0	4.55927	12.766	0	8.81459	2.43161	0	43.1611	5.77508	7.59878	6.68693	0.911854	0	0	0.303951	0.303951	0	0	0	0	0.529412
23	F9⑥	II	8.28025	0	0	2.86624	18.4713	1.27389	8.28025	0.955414	0	35.9873	9.55414	7.00637	6.05096	0.636943	0	0	0	0.636943	0	0	0	0	0.54902
24	F19D6	II	7.44048	0	0	0.892857	3.27381	0.297619	8.03571	6.54762	0.297619	29.1667	4.46429	11.9048	12.5	1.19048	0.595238	0	3.86905	9.52381	0	0	0	0	0.529412
25	G3	II	8.16327	0.291545	0	4.66472	18.9504	0	5.24781	3.49854	0.291545	30.0292	12.5364	6.99708	8.16327	0.874636	0	0	0	0.291545	0	0	0	0
26	G5	II	9.14025	1.7138	0	3.71322	9.42588	0	12.2822	9.42588	0.571265	25.7069	7.71208	9.99714	9.42588	0.856898	0	0	0.0285633	0	0	0	0	0	0.54
27	H79	II	5	0.3125	0	0.625	0.9375	0	10.9375	8.125	0	35.625	6.25	18.4375	10	2.1875	0	0	0	1.5625	0	0	0	0	0.5
28	H80	II	3.76712	0	0	2.73973	6.50685	0	7.87671	5.47945	0	36.3014	9.93151	14.0411	9.93151	2.73973	0	0	0	0.684932	0	0	0	0	0.490196
29	H80③	II	9.40171	0	0	1.7094	0	0	10.8262	18.2336	0	13.6752	1.1396	27.6353	15.3846	1.4245	0	0	0	0.569801	0	0	0	0
30	H82	II	11.1079	0	0	1.13928	0.854457	0.854457	10.5383	14.241	0	19.0829	3.98747	23.64	13.3865	0.854457	0.284819	0	0	0.0284819	0	0	0	0
31	H83	II	16.7722	0	0	3.79747	10.443	1.26582	9.17722	3.79747	0	26.8987	5.6962	13.2911	7.91139	0.632911	0	0	0	0.316456	0	0	0	0	0.529412
32	H84	II	10.3746	0.288184	0	8.64553	8.64553	0	10.6628	5.4755	0	27.0893	11.2392	5.76369	10.6628	0.864553	0.288184	0	0	0	0	0	0	0	0.48
33	H86	II	3.51438	0	0	5.11182	10.2236	0.638978	15.3355	7.66773	0.638978	23.3227	3.19489	17.8914	10.5431	1.91693	0	0	0	0	0	0	0	0	0.54
34	H87	II	1.68539	0	0	3.65169	5.05618	0.561798	13.2022	6.46067	0	33.1461	5.61798	16.573	9.83146	2.24719	0.561798	0	0	1.40449	0	0	0	0	0.44
35	H88	II	5.81395	0.581395	0	2.03488	0.581395	0.581395	19.7674	8.13953	0.290698	23.5465	5.52326	19.7674	10.4651	2.61628	0	0	0	0.290698	0	0	0	0	0.480769
36	H90	II	4.4164	0	0	0.630915	1.57729	0	22.7129	6.30915	0	23.9748	6.30915	21.1356	10.7256	1.89274	0	0	0	0.315457	0	0	0	0	0.46
37	H92	II	2.80287	0.311429	0	0.934288	2.49144	1.24572	10.2772	10.2772	0.622859	28.6515	5.2943	18.9972	14.6372	3.42572	0	0	0	0.0311429	0	0	0	0	0.5
38	H93	II	0	0	0	3.42679	11.838	0.311526	12.1495	2.80374	0.623053	40.4984	12.1495	8.41121	6.85358	0.934579	0	0	0	0	0	0	0	0	0.48
39	H94	II	7.20254	0.288101	0	1.15241	0.288101	0.576203	13.5408	10.9479	0	28.8101	2.88101	20.7433	11.8122	1.72861	0	0	0	0.0288101	0	0	0	0	0.46
40	H96	II	0.643087	0.321543	0	4.50161	7.71704	0	13.5048	6.10932	0	30.2251	3.53698	17.6849	13.1833	2.2508	0	0	0	0.321543	0	0	0	0	0.518519
41	H97	II	13.6465	0	0.31736	3.80831	15.868	0.634719	8.88607	8.56871	0.634719	20.6284	3.1736	12.377	10.1555	0.952079	0.31736	0	0	0.031736	0	0	0	0	0.48
42	H98	II	13.1045	1.56006	1.24805	9.67239	15.2886	1.24805	7.4883	2.18409	0.312012	24.961	9.36037	7.17629	6.24025	0.0624025	0.0312012	0	0.0312012	0.0312012	0	0	0	0	0.490196
43	H98①	II	2.77521	0	0	3.08356	11.7175	0	10.7925	3.08356	0	41.0114	10.4841	11.1008	5.85877	0.0616713	0	0	0	0.0308356	0	0	0	0
44	H98②	II	12.9121	0.549451	0	1.64835	0.549451	0	9.89011	15.6593	0	17.3077	3.2967	18.956	14.5604	3.2967	0	0	0	1.37363	0	0	0	0	0.436364
45	H98③	II	7.16589	0	0	5.73271	18.273	0.716589	6.09101	3.58295	0	40.8456	4.65783	5.73271	6.09101	1.07488	0	0	0	0.0358295	0	0	0	0	0.52
46	H99	II	1.49656	0	0	2.6938	10.1766	0.299312	16.7614	5.68692	0	30.2305	5.68692	15.2649	10.1766	1.49656	0	0	0	0.0299312	0	0	0	0	0.470588
47	H100	II	5.21173	0	0.325733	2.28013	3.90879	0.977199	10.7492	5.21173	0	44.6254	10.7492	7.49186	6.51466	1.30293	0.325733	0	0	0.325733	0	0	0	0	0.557692
48	H101	II	6.24814	0	0.29753	1.48765	8.92591	0.595061	8.62838	5.35555	0	28.2654	8.62838	14.8765	15.1741	1.19012	0	0	0.029753	0.29753	0	0	0	0	0.52
49	H102	II	2.20588	0	0	3.30882	18.75	0	8.08824	2.20588	0	36.0294	14.3382	5.51471	7.35294	0.735294	0	0	1.10294	0.367647	0	0	0	0	0.56
50	H103	II	10.1852	0	0	5.24691	8.64198	2.16049	14.1975	1.54321	0	37.6543	5.8642	4.32099	8.64198	1.54321	0	0	0	0	0	0	0	0	0.46
51	H104	II	10.0562	0	0	1.77462	4.14079	2.07039	11.2393	7.9858	0.29577	26.9151	5.61964	15.6758	11.2393	2.9577	0	0	0	0.029577	0	0	0	0	0.5
52	H105	II	5.67823	0	0.315457	2.2082	6.62461	0	9.46372	8.83281	0.630915	29.0221	7.57098	16.4038	9.46372	3.78549	0	0	0	0	0	0	0	0	0.4
53	H106	II	5.86239	0	0	1.23419	6.78803	0.617093	15.4273	5.55384	0.308547	29.3119	5.86239	16.0444	10.182	2.77692	0	0	0.0308547	0	0	0	0	0	0.584906
54	H107	II	1.36939	0	0.342349	1.36939	6.16227	0	15.0633	4.45053	1.02705	39.3701	6.50462	7.18932	9.58576	0.0342349	0.342349	0	2.73879	4.45053	0	0	0	0
55	H108	II	6.21118	0	0	0	1.5528	0	5.90062	3.10559	0	28.5714	4.03727	9.93789	7.14286	1.5528	1.86335	0	9.00621	21.118	0	0	0	0
56	H109	II	11.5183	0.52356	0	0	0.52356	0.26178	15.9686	8.37696	0	18.5864	5.2356	13.3508	13.8743	1.83246	0.78534	0	1.04712	8.11518	0	0	0	0	0.52
57	H110	II	5.89971	0	0	2.0649	5.89971	1.47493	8.55457	5.89971	0.589971	37.7581	4.71976	11.5044	12.6844	0.884956	0.294985	0	0	1.76991	0	0	0	0
58	H111	II	5.48387	0	0.967742	2.90323	12.9032	0.967742	9.67742	5.16129	0	32.2581	8.3871	9.03226	10.3226	1.93548	0	0	0	0	0	0	0	0	0.56
59	H112	II	7.26744	0	0	3.19767	7.26744	1.45349	10.7558	5.23256	0	30.2326	10.1744	11.9186	9.59302	1.16279	0.581395	0	0.581395	0.290698	0	0	0	0.290698	0.470588
60	H113	II	1.63881	0	0	1.96657	7.53851	1.31105	8.19403	4.2609	0.983284	36.7093	13.1105	11.4716	11.1439	0.983284	0.327761	0	0	0.0327761	0	0	0	0.327761	0.528302
61	H114①	II	5.92128	0	0	5.22466	14.629	0	7.66284	2.78649	0	37.2692	9.05608	8.35946	8.01115	0.731452	0	0	0	0.348311	0	0	0	0	0.58
62	H114②	II	8.80503	0.314465	0	5.97484	16.6667	0.943396	4.71698	2.20126	0.628931	27.044	10.0629	13.522	7.54717	1.25786	0.314465	0	0	0	0	0	0	0	0.54
63	H119	II	5.32213	0.280112	0	0	0	0	5.88235	2.2409	0.560224	56.3025	6.44258	7.28291	9.52381	1.12045	0	0	1.40056	3.64146	0	0	0	0
64	H121	II	7.36943	0.64082	0	4.48574	11.5348	0	15.3797	6.08779	0	22.7491	4.48574	17.943	7.36943	1.60205	0	0	0.032041	0.32041	0	0	0	0	0.535714
65	H122	II	3.46894	0	0	3.15358	16.714	0	10.4068	5.04573	0	31.5358	6.62252	13.245	8.51466	1.26143	0	0	0	0.0315358	0	0	0	0	0.529412
66	H123	II	6.72783	0	0	0.917431	12.844	1.52905	10.3976	5.50459	0	37.6147	7.33945	7.03364	7.95107	1.52905	0	0	0.611621	0	0	0	0	0	0.480769
67	H124	II	5.78778	0	0	3.85852	17.6849	1.28617	10.6109	3.53698	0	31.8328	7.3955	7.07395	7.3955	2.57235	0	0	0	0.96463	0	0	0	0	0.480769
68	H125	II	4.19355	0.322581	0	2.58065	6.45161	0	15.4839	5.80645	0	29.0323	6.77419	17.0968	10.3226	1.93548	0	0	0	0	0	0	0	0	0.551724
69	H127	II	1.65017	0.330033	0	0.330033	4.29043	0	15.5116	7.26073	0	25.0825	3.63036	20.132	18.4818	3.30033	0	0	0	0	0	0	0	0	0.490566
70	H128	II	7.64526	0.30581	0	4.58716	8.8685	0.917431	9.17431	1.83486	0	35.474	9.48012	10.7034	9.48012	1.52905	0	0	0	0	0	0	0	0	0.568627
71	H132	II	13.4961	0	0	2.57069	15.7455	0.642674	6.74807	1.92802	0	35.347	9.6401	5.14139	8.03342	0.35347	0.321337	0	0.0321337	0	0	0	0	0	0.517857
72	H133	II	8.76472	0	0	2.19118	12.3254	1.09559	11.2298	4.93016	0	29.0331	9.03862	12.8732	6.84744	1.64339	0	0	0.0273898	0	0	0	0	0	0.557692
73	H134	II	1.04895	0	0	7.34266	9.79021	1.04895	10.8392	8.74126	0.34965	22.028	6.64336	15.3846	12.2378	4.54545	0	0	0	0	0	0	0	0	0.584906
74	H135	II	2.45399	0	0	2.14724	3.98773	0.613497	10.4294	9.20245	0	26.3804	9.81595	16.5644	16.8712	1.53374	0	0	0	0	0	0	0	0	0.480769
75	H136	II	9.90415	0	0	6.38978	17.5719	0.638978	9.90415	2.55591	0	20.4473	5.43131	15.655	8.94569	2.55591	0	0	0	0	0	0	0	0	0.48
76	H137	II	11.8933	0	0	1.6072	8.35744	1.28576	9.32176	2.25008	0	34.0726	12.2147	10.929	6.75024	0.96432	0	0.032144	0.32144	0	0	0	0	0	0.574074
77	H138	II	15.0896	0.314367	0	3.45803	14.7752	1.8862	5.97296	2.51493	0	35.8378	8.4879	6.28733	4.7155	0.628733	0	0	0.0314367	0	0	0	0	0	0.52
78	H141	II	7.66871	0.920245	0	2.14724	9.5092	0.613497	11.3497	4.29448	0.306748	34.6626	7.36196	11.3497	7.97546	0.920245	0	0.613497	0.306748	0	0	0	0	0	0.627451
79	H142	II	16.7041	0.249314	0	3.73972	16.4547	0.747943	7.23012	2.99177	0	31.9122	7.97806	7.23012	3.4904	0.997258	0.249314	0	0	0.0249314	0	0	0	0	0.54
80	H144	II	12.2093	0.581395	0	2.61628	6.68605	0.872093	10.7558	4.36047	0	33.4302	8.72093	11.3372	7.55814	0.581395	0	0	0	0.290698	0	0	0	0	0.56
81	H146	II	9.17722	0	0	3.16456	4.11392	0.949367	12.0253	4.43038	0	34.1772	3.48101	14.2405	12.3418	1.26582	0	0	0.316456	0.316456	0	0	0	0	0.44
82	TN23E39③	II	9.80392	0	0	0	0.560224	0	12.0448	14.2857	0	17.3669	1.96078	27.1709	11.2045	1.12045	0	0	2.80112	1.68067	0	0	0	0
83	TN24E38③	II	7.39645	0.887574	0	0.591716	2.07101	0	21.8935	10.355	0.591716	22.7811	3.84615	17.1598	11.2426	0.591716	0	0	0	0.591716	0	0	0	0	0.5
84	TN24E38③pit	II	8.49396	0	0	7.18719	22.215	0	6.20712	3.92029	0	30.0555	10.7808	4.90036	4.57367	1.30676	0.326691	0	0	0.0326691	0	0	0	0	0.448276
85	TN24E39②	II	11.4706	0.294118	0	2.94118	12.0588	1.76471	13.5294	2.05882	0	31.4706	9.11765	10.2941	3.82353	0.588235	0.294118	0	0	0.294118	0	0	0	0
86	TN24E39④burntsoil	II	5.07463	0.597015	0	3.8806	11.0448	0.298507	7.46269	4.1791	0	41.4925	11.0448	6.26866	6.26866	1.19403	0	0	0	1.19403	0	0	0	0	0.490196
87	TN25E37③	II	10.0279	0.557103	0	2.22841	5.57103	0.835655	15.5989	9.7493	0.278552	17.5487	4.45682	20.8914	10.3064	1.67131	0	0	0	0.278552	0	0	0	0	0.5
88	TN25E37③pit	II	11.1821	0.319489	0	5.43131	25.2396	1.27796	6.38978	4.47284	0	24.6006	8.6262	8.6262	2.23642	1.59744	0	0	0	0	0	0	0	0	0.54
89	TN25E37⑤	II	3.10345	0	0	2.41379	19.3103	1.03448	8.62069	6.55172	0	21.3793	10	16.8966	9.31034	1.03448	0	0	0	0.344828	0	0	0	0	0.48
90	TN25E38②	II	7.92976	0.566412	0	0.283206	0.566412	0.849618	13.5939	13.3107	0.566412	15.5763	2.54885	26.0549	15.0099	3.11526	0	0	0	0.0283206	0	0	0	0	0.5
91	TN25E38③	II	5.93053	0.282406	0	7.90737	16.0971	0	12.1435	5.93053	0.282406	25.1341	6.21293	13.5555	5.93053	0.564812	0	0	0	0.0282406	0	0	0	0	0.5
92	TN25E38④	II	3.68324	0	0.526177	5.78795	16.0484	0	8.94501	4.99868	0	33.4123	8.41884	9.47119	7.89266	0.789266	0	0	0	0.0263089	0	0	0	0	0.529412
93	TN25E38⑤	II	8.18713	0.292398	0	3.80117	10.5263	0	7.60234	4.09357	0	36.5497	8.18713	9.64912	9.94152	0.877193	0	0	0	0.292398	0	0	0	0	0.5
94	TN25E39②	II	7.85498	0.302115	0	0.906344	3.62538	0.60423	10.8761	12.6888	0.302115	20.2417	3.32326	21.4502	16.3142	1.20846	0	0	0	0.302115	0	0	0	0	0.5
95	TN25E39③	II	1.31148	0	0	5.90164	17.0492	0	7.86885	1.96721	0	37.377	9.18033	9.83607	8.52459	0.655738	0	0	0	0.327869	0	0	0	0	0.46
96	TN29E34②	II	4.83871	0	0	6.77419	21.9355	2.25806	10.3226	2.90323	0	24.1935	7.41935	11.9355	5.80645	1.6129	0	0	0	0	0	0	0	0	0.471698
97	TN29E34③	II	0.96123	0	0	3.52451	9.29189	0.96123	17.3021	9.6123	0	19.545	7.04902	20.8267	8.97148	1.92246	0	0	0	0.032041	0	0	0	0	0.54902
98	TN29E34④	II	10.3152	0.573066	0	4.58453	4.29799	0	8.02292	6.01719	0	19.1977	4.87106	12.0344	9.45559	0	0.859599	0	2.5788	5.15759	7.73639	0.859599	3.4384	0
99	TN30E34②	II	5.44033	0	0	7.48045	15.6409	0	16.661	1.7001	0.680041	26.8616	7.14043	10.5406	6.80041	1.02006	0	0	0	0.034002	0	0	0	0	0.54902
100	TN30E34③	II	4.78927	0.319285	0	7.34355	14.0485	1.27714	16.6028	3.51213	0.319285	33.8442	5.10856	5.42784	6.3857	0.957854	0	0	0.0319285	0.0319285	0	0	0	0	0.480769
101	TN30E34④	II	10	0	0	3.82353	15.2941	0.588235	10.5882	4.70588	0.588235	20.5882	5.88235	15.8824	9.41176	2.35294	0	0	0	0.294118	0	0	0	0	0.490196
102	TN30E34⑤	II	6.53409	0	0	3.69318	10.2273	1.70455	8.23864	4.26136	0	34.375	12.5	11.6477	5.68182	0.568182	0	0	0	0.568182	0	0	0	0	0.6
103	TN30E35③	II	2.33333	0.333333	0	5	15	1.66667	14.3333	5	0.333333	31	9	7.33333	6.66667	2	0	0	0	0	0	0	0	0	0.48
104	TN31E34③	II	12.5694	0.584624	0	4.09237	15.2002	2.63081	9.06168	3.50775	0	30.6928	10.2309	6.13856	4.09237	1.16925	0	0	0	0.0292312	0	0	0	0	0.490196
105	TN31E34④	II	0.287356	0.287356	0	1.43678	3.44828	0	12.931	18.1034	0	24.1379	4.5977	23.2759	10.3448	1.14943	0	0	0	0	0	0	0	0	0.52
106	TN31E34⑤	II	8.49673	0.653595	0	6.86275	19.281	1.30719	6.86275	2.94118	0.326797	27.1242	12.7451	8.82353	3.59477	0.980392	0	0	0	0	0	0	0	0	0.480769
107	TN31E35③	II	9.91254	0	0	1.74927	1.45773	1.16618	14.5773	9.91254	0	24.4898	3.79009	22.449	7.28863	1.74927	0	0	0	1.45773	0	0	0	0	0.54
108	TN31E35⑤	II	6.53595	0.326797	0	3.92157	18.9542	0.980392	10.1307	2.94118	0.326797	32.6797	7.84314	8.16993	5.88235	0.980392	0	0	0	0.326797	0	0	0	0	0.54902
109	TN31E37③	II	6.23145	0	0	1.18694	14.5401	0.890208	13.3531	2.96736	0	34.7181	8.01187	9.19881	6.23145	1.48368	0	0	0	1.18694	0	0	0	0	0.5
110	TN32E34③	II	4.47284	0.319489	0	7.34824	23.3227	2.23642	8.94569	2.8754	0	22.6837	5.11182	15.3355	5.7508	1.59744	0	0	0	0	0	0	0	0	0.535714
111	TN32E34⑤	II	8.20189	0	0	5.36278	10.4101	0.630915	11.9874	5.67823	0	28.3912	9.14826	11.3565	7.25552	1.57729	0	0	0	0	0	0	0	0	0.568627
112	TN32E35③	II	8.41152	1.29408	0	7.44096	13.2643	0.97056	13.9114	1.29408	0.64704	23.617	7.44096	13.2643	7.11744	1.29408	0	0	0	0.032352	0	0	0	0	0.46
113	TN32E35④	II	8.98204	0	0	5.98802	22.1557	1.79641	7.78443	3.59281	0	27.2455	7.78443	8.38323	5.08982	0.898204	0	0	0	0.299401	0	0	0	0	0.54902
114	TN32E35⑤	II	1.5625	0	0	2.5	10	1.25	14.0625	5.9375	0.3125	36.5625	6.5625	11.25	8.75	0.625	0	0	0	0.625	0	0	0	0	0.54
115	TN32E36②	II	5.91716	0.295858	0	2.07101	11.8343	0.591716	17.4556	2.36686	0	33.432	8.57988	9.76331	5.6213	0.887574	0	0	0	1.18343	0	0	0	0	0.44
116	TN32E36③	II	8.46906	0.325733	0	6.51466	17.2638	1.30293	6.84039	4.23453	0.325733	31.2704	7.16612	7.81759	6.84039	0.977199	0	0	0	0.651466	0	0	0	0	0.470588
117	TN32E36④	II	8.74636	0.58309	0	0.291545	2.33236	1.16618	9.32945	10.2041	0	28.5714	4.66472	18.9504	13.4111	0.58309	0	0	0	1.16618	0	0	0	0
118	TN32E36⑤	II	9.68447	0	0	1.24961	9.99688	0.312402	10.6217	3.43643	0	35.6139	4.68604	14.3705	8.74727	1.24961	0	0	0	0.0312402	0	0	0	0	0.52
119	TN32E37④	II	5.57276	0	0	4.64396	17.0279	0	9.28793	5.57276	0	31.2693	5.26316	11.1455	8.66873	1.54799	0	0	0	0	0	0	0	0	0.5
120	TN32E37⑤	II	4.95627	0.291545	0	9.62099	18.9504	0.874636	3.49854	4.37318	0	21.8659	10.2041	14.2857	6.70554	4.37318	0	0	0	0	0	0	0	0	0.6
121	TN32E38②	II	8.68263	0.299401	0	1.79641	11.6766	2.39521	5.68862	5.98802	0	31.1377	4.79042	16.7665	8.68263	1.49701	0	0	0	0.598802	0	0	0	0	0.54902
122	TN32E38③	II	10.6509	0	0	1.77515	17.7515	0.295858	13.0178	2.66272	0	33.7278	3.84615	8.57988	6.21302	1.47929	0	0	0	0	0	0	0	0	0.529412
123	TN32E39③	II	0.643087	0	0	1.60772	9.00322	3.53698	9.32476	6.43087	0.321543	33.7621	8.03859	16.7203	8.36013	0.96463	0	0	0	1.28617	0	0	0	0	0.42
124	TN33E34②	II	11.8457	0.550964	0	2.20386	12.3967	1.92837	9.91736	4.95868	0.275482	26.4463	5.78512	14.6006	7.7135	0.826446	0	0	0	0.550964	0	0	0	0	0.56
125	TN33E34③	II	5.61404	0	0	5.26316	13.6842	0.701754	8.42105	1.40351	0	37.8947	10.8772	8.07018	2.45614	0.701754	0	0	0	4.91228	0	0	0	0	0.4
126	TN33E34④	II	4.0625	0	0	5.625	12.8125	1.875	13.4375	4.375	0	32.5	4.6875	10.9375	7.8125	1.5625	0	0	0	0.3125	0	0	0	0	0.470588
127	TN33E34⑤	II	1.00671	0.33557	0	2.34899	16.1074	2.01342	9.73154	4.02685	0	42.6174	5.36913	10.4027	5.36913	0.671141	0	0	0	0	0	0	0	0	0.470588
128	TN33E35②	II	10.1538	0	0	7.07692	15.0769	1.84615	7.07692	6.46154	0	24.6154	7.69231	14.1538	4.92308	0.923077	0	0	0	0	0	0	0	0	0.568627
129	TN33E35③	II	9.81294	0.613309	0	5.82643	20.8525	1.83993	9.50629	1.53327	0	28.5189	5.21312	11.3462	4.29316	0.613309	0	0	0	0.0306654	0	0	0	0	0.5
130	TN33E35③burntsoil	II	3.42466	0	0	5.47945	19.863	1.0274	8.21918	2.73973	0	30.4795	8.90411	10.6164	7.53425	1.71233	0	0	0	0	0	0	0	0	0.461538
131	TN33E35④	II	2.11193	0	0	7.39176	19.3594	0.703977	8.09574	4.22386	0	35.5509	7.39176	8.44773	5.63182	1.05597	0	0	0	0.0351989	0	0	0	0	0.509804
132	TN33E35⑤	II	3.82166	0.318471	0	6.05096	20.0637	0.955414	6.6879	4.77707	0.318471	26.4331	8.59873	14.0127	6.6879	1.27389	0	0	0	0	0	0	0	0	0.46
133	TN33E36②	II	7.48279	0.299312	0	3.89105	15.5642	0.598623	7.48279	6.88417	0	28.7339	8.97935	10.4759	8.38072	1.19725	0	0	0	0.0299312	0	0	0	0	0.46
134	TN33E36③	II	11.7834	0.955414	0	0.955414	18.1529	0	6.36943	0.636943	0	35.0318	10.1911	6.6879	7.96178	0.636943	0	0	0	0.636943	0	0	0	0	0.555556
135	TN33E36④	II	9.24092	0	0	9.24092	20.7921	0.990099	7.59076	3.9604	0	18.4818	8.25083	11.8812	6.27063	3.30033	0	0	0	0	0	0	0	0	0.470588
136	TN33E37②	II	11.4804	0.302115	0	1.81269	17.5227	0.906344	6.94864	3.02115	0	30.5136	7.85498	13.8973	4.22961	1.20846	0	0	0	0.302115	0	0	0	0	0.56
137	TN33E37③	II	5.02959	0.295858	0	2.66272	16.8639	1.18343	8.57988	9.46746	0	26.0355	5.32544	14.497	6.80473	2.36686	0	0	0	0.887574	0	0	0	0	0.44
138	TN33E37④	II	9.28793	0	0	1.23839	13.0031	1.85759	9.90712	4.95356	0	30.9598	6.81115	14.2415	4.64396	2.78638	0	0	0	0.309598	0	0	0	0	0.54902
139	TN33E38③	II	9.48012	0	0	3.0581	13.7615	0.30581	9.78593	7.33945	0	25.9939	5.8104	16.5138	6.42202	0.917431	0	0	0	0.611621	0	0	0	0	0.52
140	TN33E38④	II	12	0.307692	0	1.23077	9.53846	1.53846	9.23077	3.07692	0	41.2308	7.07692	6.46154	7.07692	0.615385	0	0	0	0.615385	0	0	0	0	0.480769
141	TN34E34②	II	5.33333	0	0	5.33333	17	1.66667	7.66667	4.33333	0	28.6667	4.33333	16.3333	7.33333	2	0	0	0	0	0	0	0	0	0.46
142	TN34E34③	II	2.13523	0.355872	0	3.20285	7.47331	0.711744	9.25267	5.69395	0.355872	40.5694	6.40569	14.9466	7.47331	1.06762	0	0	0	0.355872	0	0	0	0	0.444444
143	TN34E34④	II	5.78778	0.321543	0	3.53698	16.0772	1.28617	7.07395	3.21543	0.321543	26.3666	10.6109	17.0418	5.46624	2.89389	0	0	0	0	0	0	0	0	0.42
144	TN34E35②	II	9.74212	0.286533	0	0.286533	0.286533	0.573066	8.88252	9.16905	0	25.2149	4.01146	25.2149	11.1748	1.43266	0.573066	0	0.859599	2.29226	0	0	0	0	0.431373
145	TN34E35④	II	8.81459	0	0	0.911854	2.12766	0.607903	10.3343	4.55927	0.911854	31.003	3.34347	24.6201	11.2462	1.51976	0	0	0	0	0	0	0	0	0.462963
146	TN34E36②	II	8.70348	0.30012	0	1.20048	12.3049	0.30012	7.20288	1.5006	0	45.9184	9.90396	5.70228	5.70228	0.060024	0.30012	0	0.30012	0.60024	0	0	0	0
147	TN34E36③	II	4.6875	0.3125	0	1.875	14.0625	0.9375	12.8125	5.3125	0	31.25	2.5	11.25	11.5625	2.1875	0	0	0	1.25	0	0	0	0	0.46
148	TN34E36④	II	7.64706	0.294118	0	1.76471	1.47059	0.588235	8.52941	12.6471	0	23.2353	4.41176	24.4118	10	4.11765	0	0	0	0.882353	0	0	0	0	0.46
149	TN34E36⑤	II	8	0	0	2.46154	12	0.923077	5.84615	7.07692	0.307692	32.6154	7.69231	13.8462	7.69231	1.23077	0	0	0	0.307692	0	0	0	0	0.423077
150	TN34E37②	II	3.54223	0	0	2.17984	19.346	0.817439	5.99455	1.90736	0	34.0599	12.5341	11.1717	5.72207	1.3624	0	0	0.27248	1.08992	0	0	0	0	0.46
151	TN34E37④	II	10.5096	0	0	1.59236	16.879	0.636943	9.23567	1.59236	0	35.0318	8.59873	9.87261	4.77707	0.955414	0	0	0	0.318471	0	0	0	0	0.519231
152	TN34E38②	II	12.462	0.303951	0	1.21581	17.9331	0.607903	10.3343	2.12766	0	34.3465	5.77508	10.0304	4.25532	0.607903	0	0	0	0	0	0	0	0	0.519231
153	TN34E38③	II	6.84039	0	0	1.62866	19.544	0.325733	11.7264	2.28013	0	29.9674	10.0977	10.0977	5.53746	1.9544	0	0	0	0	0	0	0	0	0.431373
154	TN34E38④	II	14.1141	1.2012	0	6.30631	20.1201	0.3003	3.6036	0.3003	0	32.1321	11.7117	4.5045	3.9039	0.600601	0	0	0	1.2012	0	0	0	0	0.585366
* Sample codes start with T: cultural layers; Sample codes start with H: pits; Sample codes start with F: house foundations; Sample codes start with G: ditches
